# Supplementary material for: Changes in the Red Sea Overturning Circulation during Marine Isotope Stage 3
Source: Copernicus journal article supplement (doi:10.5194/egusphere-2023-1677), 2023-08-08
Supplement: Supplementary file [file egusphere-2023-1677-AC2-supplement.pdf]

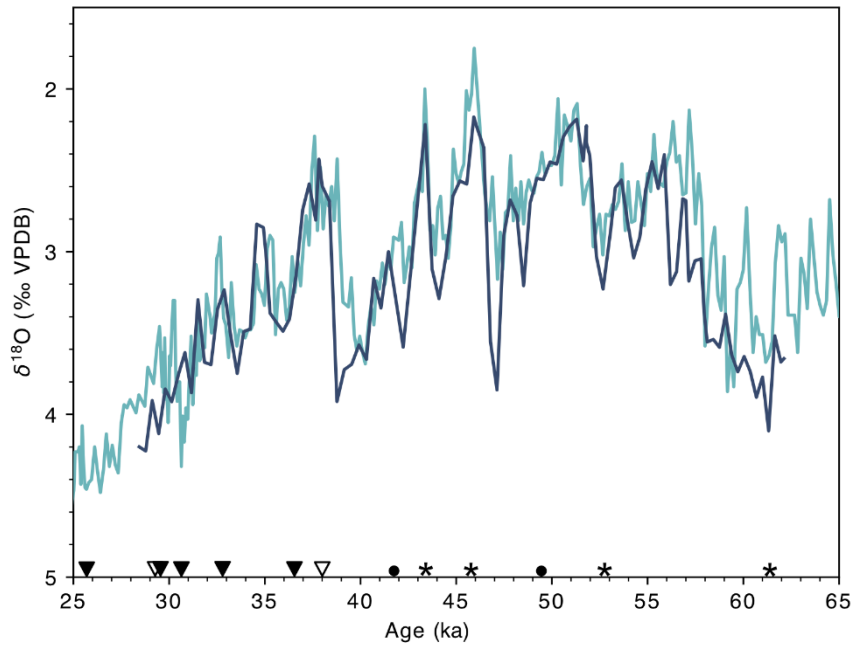

**Figure 4.** Alignment of benthic  $\delta^{18}\text{O}$  records of cores KL11 from the central Red Sea (dark blue) and GeoB5844-2 from the northern Red Sea (light blue). Black triangles represent the radiocarbon dates, and black dots the paleomagnetic data used for the establishment of the age model of GeoB5844-2 (Arz et al., 2007). The age model of KL11 is based on two radiocarbon dates of KL11 (white triangles; Schmelzer, 1998) and the graphical correlation of the  $\delta^{18}\text{O}$  records. Black asterisks represent the graphical tie-points.

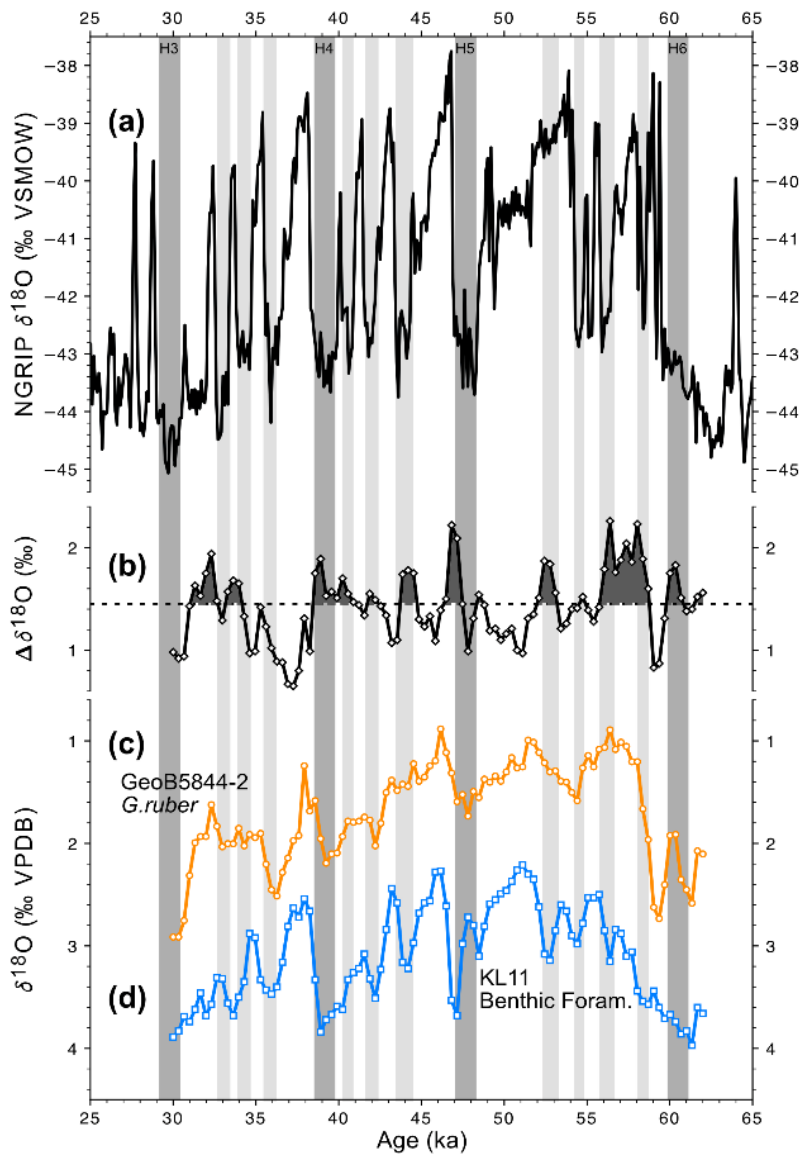

**Figure 7.** Comparison of epibenthic and planktic stable oxygen isotope records from the Red Sea, their resulting difference, and the Greenland stable oxygen isotope record. **(a)**  $\delta^{18}\text{O}$  record of the North Greenland Ice Core Project (NGRIP members, 2004) against the extended GICC05 age scale (Svensson et al., 2008; Wolf et al., 2010). **(b)** Difference in the stable oxygen isotope records ( $\Delta\delta^{18}\text{O}$ ) of **(d)** the composite epibenthic  $\delta^{18}\text{O}$  of KL11 from the central Red Sea and **(c)** the planktic (*Globigerinoides ruber*)  $\delta^{18}\text{O}$  of GeoB5844-2 from the northern Red Sea (Arz et al., 2007). For calculation of the  $\Delta\delta^{18}\text{O}$  values, the single records were resampled at a spacing of 330 years. The stippled line in the  $\Delta\delta^{18}\text{O}$  record marks the mean value. Grey bars represent northern hemisphere stadials and Heinrich events.
